# Supplementary material
Source: publisher site journal article supplement (https://www.dovepress.com/get_supplementary_file.php?f=237816.docx)
Supplement: Supplementary file 1 [file get_supplementary_file.php]

**Supplementary Data**

**Transmission Electron Microscopy Studies of Chemically Stable Black Phosphorus Nanosheets against *Escherichia Coli* bacteria**

Abhijit H. Phakatkar1, Emre Firlar1,2,3, Laura Alzate1,†, Boao Song2, Surya Narayanan1, Ramin Rojaee2, Tara Foroozan2, Ramasubramonian Deivanayagam2, David Banner1, Reza Shahbazian-Yassar2, Tolou Shokuhfar1

1 Department of Bioengineering, University of Illinois at Chicago, Chicago, IL, 60607, USA

2 Department of Mechanical and Industrial Engineering, University of Illinois at Chicago, IL, 60607, USA

3 Institute for Quantitative Biomedicine, Rutgers University, Piscataway, NJ 08854, USA

† Miss Alzate passed away on *[10/20/2019].*

Antibacterial activity of synthesized BP nanosheets

*Transmission electron microscopy analysis of E. Coli bacteria treated with BP nanosheets*


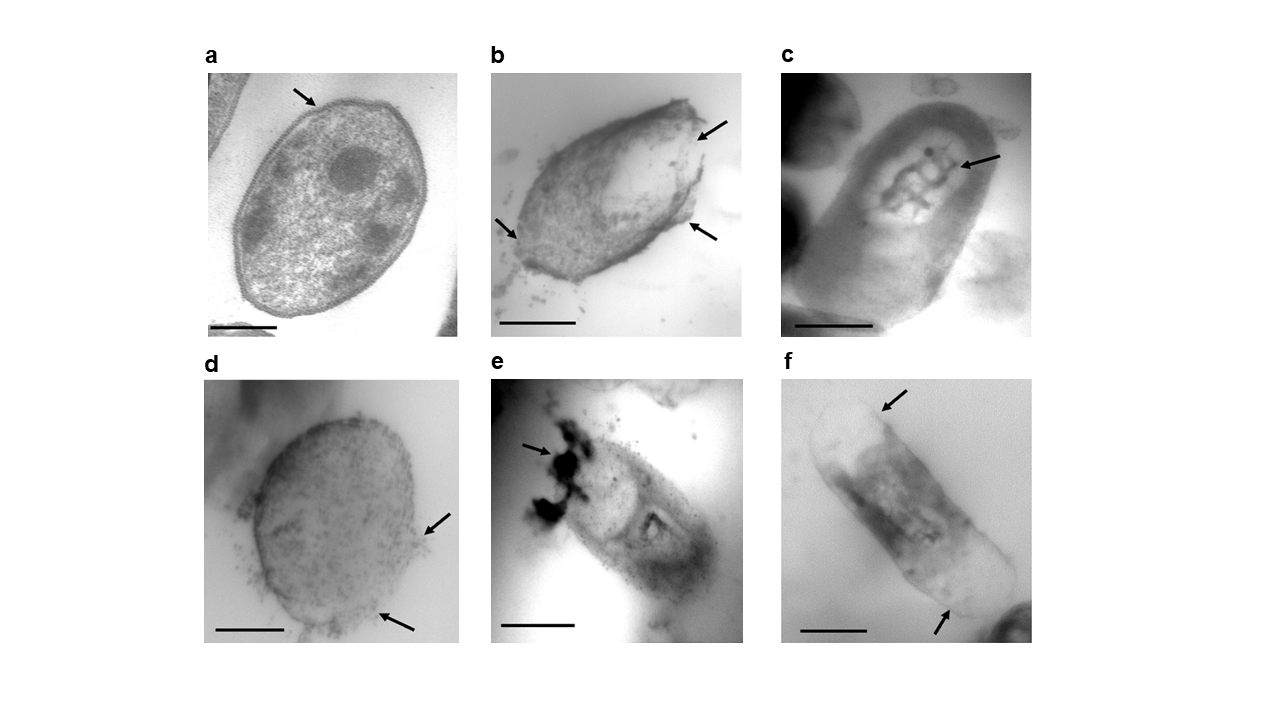


**Figure S1** TEM micrographs of damaged *E. Coli* bacteria upon treating with exfoliated BP nanosheets for 3 hours. (a) Internal cell structure of untreated E. Coli bacterium – control sample (Scale bar is 200 nm). An arrow indicates the intactness of the bacterial cell wall with the cytoplasm. (b) Ruptured cell membrane and the event of cytoplasmic leakage from the cell membrane (Scale bar is 500 nm). The arrowsshow the events of the cytoplasmic leakage and the disruption of the bacterial cell wall. (c) Central large electron light area indicating accumulation of DNA molecules confirming disturbed cellular metabolism (Scale bar is 400 nm). An arrow indicates the electron-light region in the center of the bacterial cell. (d) Reduced density of phospholipids upon interacting with BP nanosheets (Scale bar is 200 nm). The arrows indicate the disintegrated phospholipids layer. (e) The event of BP nanosheets interacting with cell membrane and detached cytoplasm from the cell membrane (Scale bar is 500 nm). An arrow indicates the BP nanosheets attached with the bacterium. (f) Ruptured cell wall and separation of cytoplasm from the cell wall (Scale bar is 500 nm). The arrows indicate the regions of the lost cellular integrity.

*Attenuated Total Reflectance-Fourier transform infrared spectroscopy (ATR-FTIR) analysis of E. Coli bacteria treated with BP nanosheets:*

Bacterial cultures were treated with 100 µg/mlBP nanosheets for 3 hours. Controlled untreated bacteria cultures and BP nanosheets treated bacteria cultures were centrifuged and rinsed with PBS. 50 µl aliquots were dropped on glass slide and allowed to dry in air in the similar manner as reported.1 Obtained dry thin films of bacteria were analyzed with Nicolet iS50 spectrometer in ambient conditions. Spectra were recorded with the scan number of 64 in the range of 2675–2975 cm-1.

ATR-FTIR analysis of bacterial cells can determine the cell membrane functional groups and surface chemistry along with the details of molecular level alterations occurred in the bacterial cell wall structure.2,3 ATR-FTIR characterization results confirm the bacterial cell wall damage caused by BP nanosheets. **Figure S2** shows ATR-FTIR spectra of untreated *E. Coli* bacteria and BP nanosheets treated *E. Coli* bacteria. Upon incubating *E. Coli* bacteria cultures with 100 µg/ml of synthesized BP nanosheets for 3 hours, prominent change was observed indicating the reduction in the respective band intensities at ~2924 cm-1 and ~2853 cm-1 wavenumbers. The bands at 2924 cm-1 and 2853 cm-1 belong to cell wall compounds mainly lipids with the contribution from carbohydrates, proteins and nucleic acids.4 The band at 2924 cm-1 wavenumberis responsible for -CH asymmetric stretching of >CH3 in fatty acids and that at 2853 cm-1 wavenumber is responsible for -CH symmetric stretching of CH2 in fatty acids.3,5 As reported earlier, BP nanosheets have ability to generate reactive oxygen species (ROS) which can possibly result into the bacterial cell membrane peroxidation. The quantitative reduction in the cell membrane components upon 3 hours of interaction of BP nanosheets (100 µg/ml concentration) was approximately 22.56% (negative error of ~1.5% considered). The Gaussian curve fit regression (R2) values of 99.27% and 99.73% for untreated *E. Coli* and BP treated *E. Coli* curves, respectively, were achieved for analyzing the area under the curves from the same baseline.


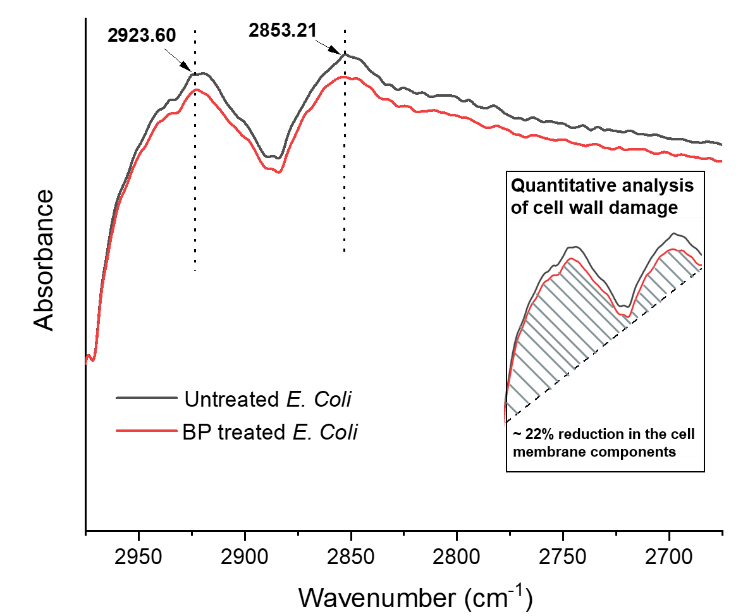


**Figure S2** ATR-FTIR spectra of untreated *E. Coli* bacteria (represented in black) and BP nanosheets treated *E. Coli* bacteria (represented in red) confirming cell wall damage caused by BP nanosheets (100 µg/ml) within 3 hours of interaction. (**Inset:** representation of approximate percent reduction in the cell membrane components upon interacting with BP nanosheets analyzed from processed ATR-FTIR data.)

# References

1. Pulingam T, Thong KL, Ali ME, et al. Graphene oxide exhibits differential mechanistic action towards Gram-positive and Gram-negative bacteria. *Colloids and Surfaces B: Biointerfaces.* 2019;181:6-15.

2. Leung YH, Xu X, Ma AP, et al. Toxicity of ZnO and TiO2 to Escherichia coli cells. *Sci Rep.* 2016;6:35243.

3. Faghihzadeh F, Anaya NM, Schifman LA, Oyanedel-Craver V. Fourier transform infrared spectroscopy to assess molecular-level changes in microorganisms exposed to nanoparticles. *Nanotechnology for Environmental Engineering.* 2016;1(1).

4. Rajasekar T DB, Kumaran S, George E, Gnana J, Balamurugan S. Isolation of bioactive compound from marine seaweeds against fish pathogenic bacteria Vibrio alginolyticus (VA09) and characterisation by FTIR. *Journal of Coastal Life Medicine.* 2013.

5. Naumann D. and Meyers R. Encyclopedia of analytical chemistry. *John Wiley & Sons C,* UK (2000): 102-131.
